# Supplementary material
Source: MDPI journal article supplement (https://www.mdpi.com/2227-9717/10/5/1038)
Supplement: s1 [file s1]

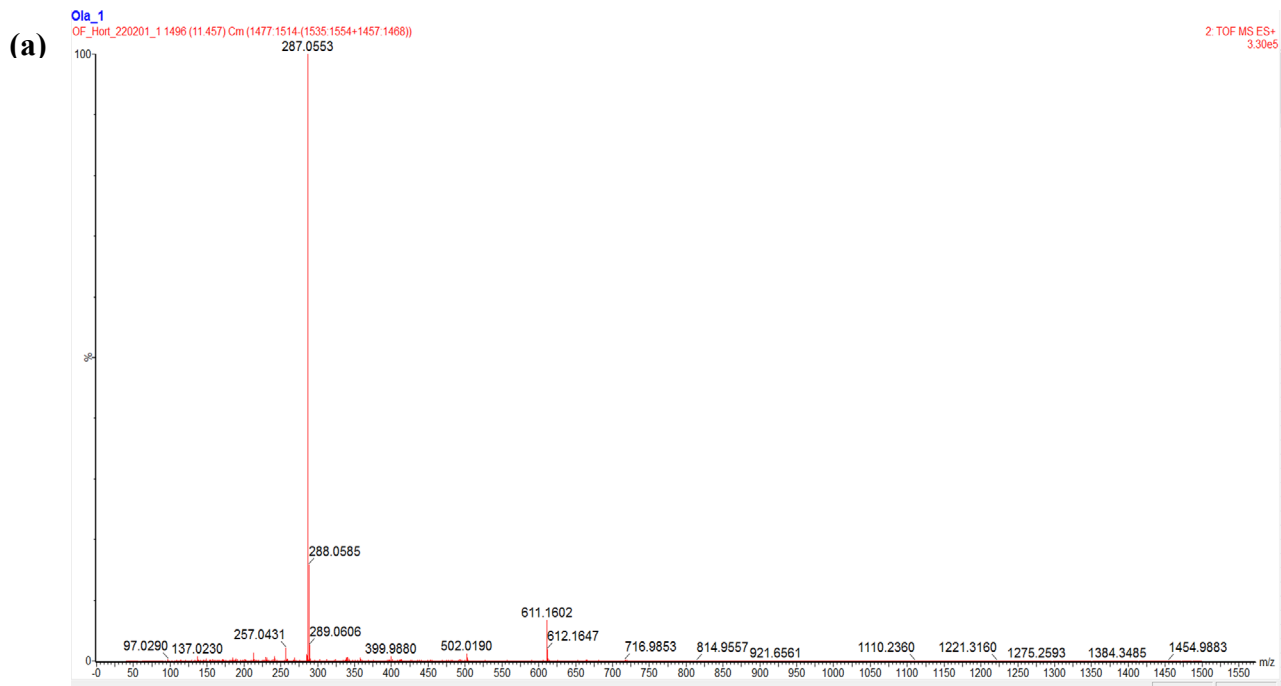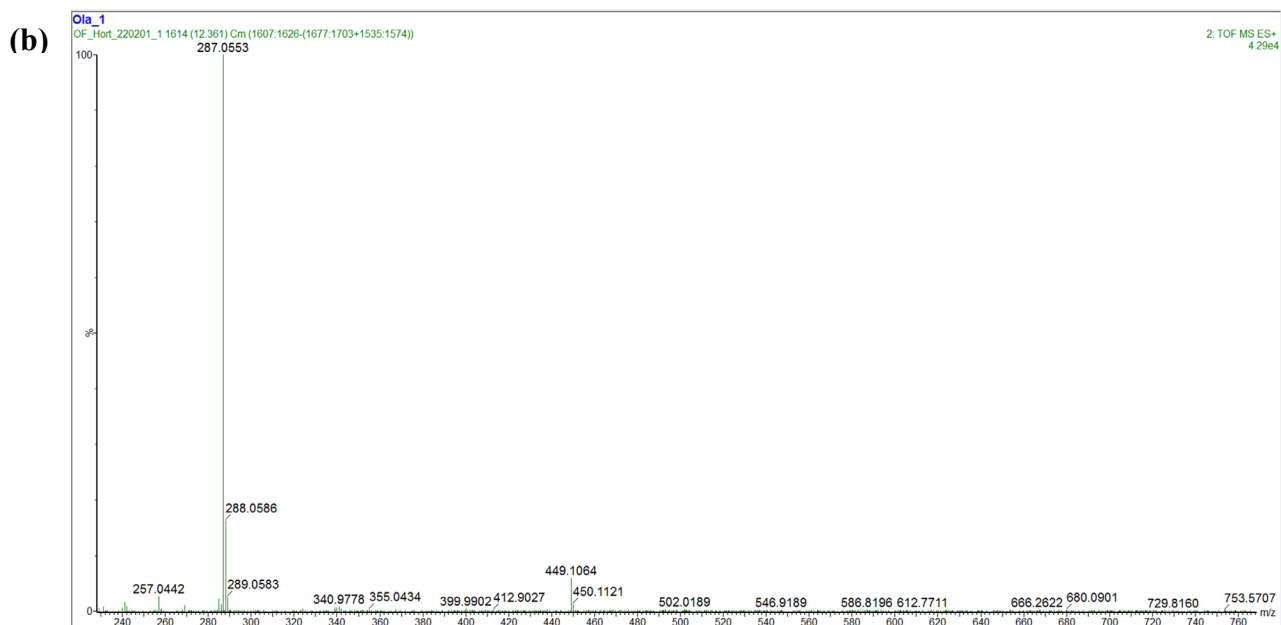

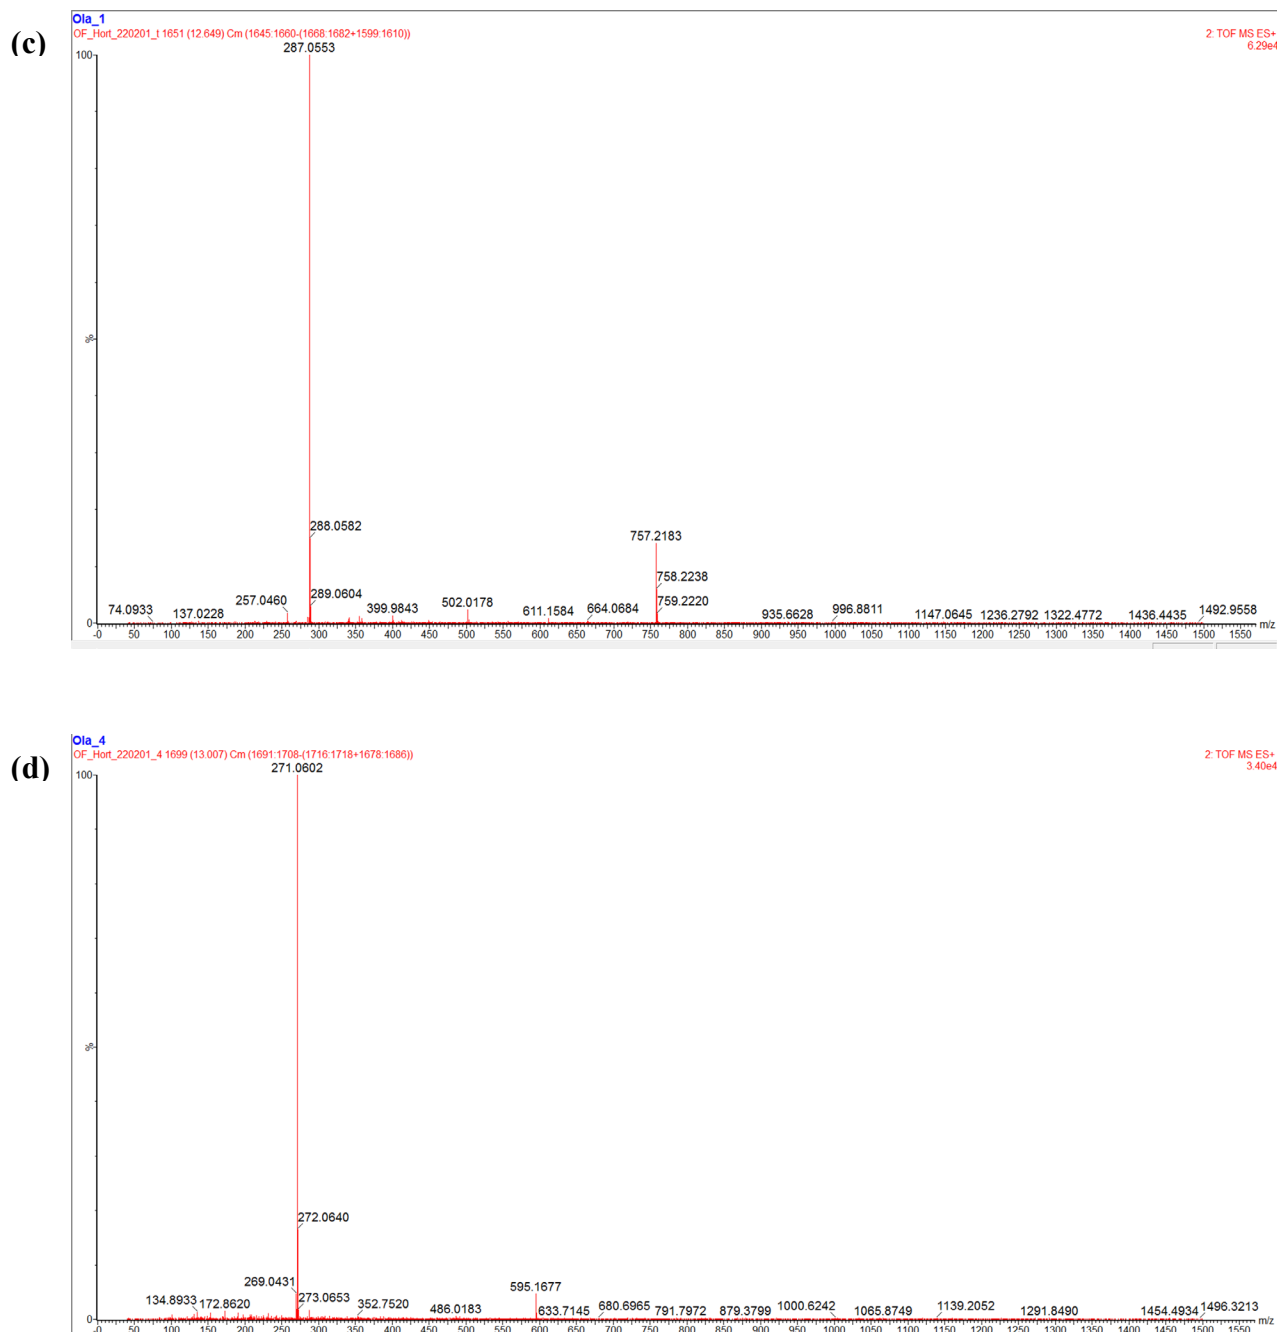

**Figure S1.** Mass spectra of some of the identified anthocyanin compounds (a) Mass spectra of Cyanidin diglucoside showing an observed  $m/z$  611.1602 in all the raspberry juice powders; (b) Mass spectra of Cyanidin 3-*O*-galactoside showing an observed  $m/z$  449.1082 in all the raspberry juice powders; (c) Mass spectra of Cyanidin 3-*O*-glucosyl-rutinoside showing an  $m/z$  757.2183 in all the raspberry juice powders; (d) Mass spectra of Cyanidin 3-*O*-rutinoside showing an observed  $m/z$  595.1665 in the maltodextrin and waxy starch encapsulated powders.

**Table S1.** Chromatographic and spectrometric parameters including retention time, adduct ion, theoretical and measured mass ( $m/z$ ), accuracy and sensitivity for anthocyanins (n=4) in the investigated raspberry juice powders.

| Tentative Assignment             | Retention time (min) | Chemical formula                                | [M-H] <sup>-</sup> theoretical mass ( $m/z$ ) | [M-H] <sup>-</sup> Experimental mass ( $m/z$ ) | MS/MS Fragment ions ( $m/z$ ) | Accuracy (ppm) | Sensitivity (ppm) | UV (nm) |
|----------------------------------|----------------------|-------------------------------------------------|-----------------------------------------------|------------------------------------------------|-------------------------------|----------------|-------------------|---------|
| Cyanidin diglucoside             | 11.36                | C <sub>27</sub> H <sub>31</sub> O <sub>16</sub> | 611.1612                                      | 611.1610                                       | 611.1608, 287.0554            | 0.3            | -                 | 550     |
| Cyanidin 3-O-galactoside         | 12.31                | C <sub>21</sub> H <sub>21</sub> O <sub>11</sub> | 449.1050                                      | 449.1082                                       | 449.1070, 287.0558            | 3.2            | 1.09              | 550     |
| Cyanidin 3-O-glucosyl-rutinoside | 12.53                | C <sub>33</sub> H <sub>41</sub> O <sub>20</sub> | 757.2132                                      | 757.2170                                       | 757.2189, 287.0552            | 3.6            | -                 | 550     |
| Cyanidin 3-O-rutinoside          | 13.42                | C <sub>27</sub> H <sub>31</sub> O <sub>15</sub> | 595.1651                                      | 595.1665                                       | 595.1680, 287.0554            | 2.4            | -                 | 550     |

- = no sensitivity
